# Supplementary material
Source: MDPI journal article supplement (https://www.mdpi.com/2227-9717/9/9/1518)
Supplement: s1 [file s1]

Archive with 2 entries (2 files):
- Supplementary Data.xlsx
- Supplementary Material.pdf
