# Supplementary material
Source: MDPI journal article supplement (https://www.mdpi.com/2227-9717/9/9/1518)
Supplement: s1 [file s1 › Supplementary Data.xlsx]

## Sheet: Raw data
	RI
Sample	Glucose	mM			STD	AV	RSTD	Xylose	mM			STD	AV	RSTD	Formic Ac. (UV)		mM		STD	AV	RSTD	Acetic Ac.	mM			STD	AV	RSTD	Levulinic Ac.		mM		STD	AV	RSTD	HMF	mM			STD	AV	RSTD	Furfural	mM				STD	AV
P19N2	1.52878	1.56141	1.60215	1.56281	0.0300198	1.56379	0.0191969	10.6509	10.8512	10.7818	10.7626	0.0830289	10.7616	0.00771529	19.7147	20.112	20.2492	21.2965	0.674804	20.3431	0.0331712	69.9184	68.4294	70.0009	68.454	0.877083	69.2007	0.0126745	0.1653	0.0756358	0.0622125	0.0330929	0.0569967	0.0840603	0.678045	2.43915	2.4477	2.41687	2.55398	0.061103	2.46442	0.024794	21.7217	18.719	11.9639	9.76751	17.5144	2.16671	19.3184
P33N	0.500957	0.483434	0.509975	0.496838	0.0110379	0.497801	0.0221732	1.87505	1.94931	1.84928	1.87423	0.0432495	1.88697	0.0229201	6.18893	5.87542	6.74119	6.12121	0.365403	6.23169	0.0586362	21.1228	19.4617	20.89	19.4504	0.900132	20.2313	0.0444922	0.0691984	0.0578816	-	-	0.00800223	0.06354	0.12594	0.124257	0.110558	0.146974	0.119246	0.0155437	0.125259	0.124092	0.673976	0.583801	-	0.247348	0.504111	0.0849862	0.587296
P34N	1.63532	1.6098	1.72667	1.70298	0.0551353	1.66869	0.033041	2.94793	3.03436	3.10136	3.05873	0.0646712	3.0356	0.0213043	20.7036	20.9052	22.0608	22.3981	0.838232	21.5169	0.0389568	76.0498	74.4312	76.7877	74.088	1.29011	75.3392	0.017124	0.152086	0.128129	0.0528094	0.0807593	0.0449217	0.103446	0.434253	4.43576	4.34125	4.39766	4.39923	0.0390101	4.39347	0.0088791	25.9257	21.1416	13.6413	12.5074	19.754	3.23788	22.2738
P35N	1.85479	1.79164	1.84849	1.88108	0.0376541	1.844	0.0204198	6.23844	6.05477	6.00596	6.36274	0.165264	6.16548	0.0268047	19.7607	20.5782	20.8137	21.747	0.8173	20.7249	0.0394357	72.476	71.1805	72.0408	71.1848	0.64597	71.7205	0.00900677	0.138442	0.122033	0.0507106	0.0491108	0.0468623	0.0900739	0.520265	3.62528	3.63958	3.61478	3.711	0.0434337	3.64766	0.0119073	25.7618	21.6214	12.5353	11.4787	-	2.92772	23.6916
P36N	0.596787	0.571056	0.60754	0.582598	0.015983	0.589495	0.0271129	4.58054	4.55257	4.49968	4.44026	0.0618746	4.51826	0.0136943	9.27268	9.18912	9.74967	9.54625	0.256982	9.43943	0.0272244	32.5061	30.4832	32.2529	30.4658	1.10473	31.427	0.0351524	0.114221	-	-	0.0287371	0.060446	0.0714789	0.845648	0.343262	0.243883	0.252604	0.285376	0.045016	0.281281	0.160039	3.70123	2.86968	1.48014	1.58273	-	0.587997	3.28546
P37N	1.82591	1.83223	1.8418	1.83912	0.00715127	1.83477	0.00389765	3.9111	3.70876	3.58308	3.68067	0.137764	3.7209	0.0370245	19.9934	20.4835	21.6004	22.2614	1.03325	21.0847	0.0490048	74.0878	72.6439	73.4554	72.68	0.690864	73.2168	0.00943586	0.165723	0.11123	0.0615814	0.0325325	0.0584926	0.0927666	0.630535	4.27915	4.27031	4.16579	4.31373	0.0637841	4.25724	0.0149825	21.9526	17.9604	11.5654	8.83851	16.1495	2.96907	18.6875
P38N	2.67464	2.71267	2.7209	2.72726	0.0268894	2.69365	0.00998249	11.1508	11.2953	11.1523	11.2186	0.102192	11.223	0.00910558	32.1959	33.4952	33.7165	36.0715	1.61383	33.8698	0.0476481	107.47	106.837	107.106	106.772	0.4472	107.153	0.00417345	0.298323	0.2735	0.144595	0.0725253	0.107018	0.197236	0.54259	4.04901	4.13883	4.08578	4.04521	0.0434562	4.07971	0.0106518	32.9694	32.5394	17.6123	18.6844	23.5851	5.29825	29.6979
P39N	1.052	-	-	-		1.052	0	7.765	-	-	-		7.765	0	29.619	-	-	-		29.619	0	72.258	-	-	-		72.258	0	-	-	-	-				1.517	-	-	-		1.517	0	11.789	-	-	-	-		11.789
P40N	1.50018	-	-	-		1.50018	0	16.5692	-	-	-		16.5692	0	17.9761	-	-	-		17.9761	0	70.81	-	-	-		70.81	0	0.16782	-	-	-		0.16782	0	2.3625	-	-	-		2.3625	0	22.7627	-	-	-	-		22.7627
P34N*	1.661	-	-	-		1.661	0	3.166	-	-	-		3.166	0	24.662	-	-	-		24.662	0	88.453	-	-	-		88.453	0	-	-	-	-				3.858	-	-	-		3.858	0	16.886	-	-	-	-		16.886
P35N W1	0.192931	0.189669	-	-	0.0023066	0.1913	0.0120575	0.489484	0.479054	-	-	0.00737524	0.484269	0.0152296	2.25483	2.44369	-	-	0.133546	2.34926	0.0568459	7.71207	7.72558	-	-	0.00955283	7.71883	0.0012376	-	-	-	-				0.357093	0.340471	-	-	0.0117534	0.348782	0.0336985	2.10203	1.09263	-	-	-	0.713759	1.59733
P36N W1	0.114324	0.116853	-	-	0.00178855	0.115589	0.0154734	0.684285	0.654884	-	-	0.0207892	0.669584	0.031048	2.11484	2.17396	-	-	0.0418043	2.1444	0.0194946	6.50742	6.1272	-	-	0.268857	6.31731	0.0425587	-	-	-	-				0.0660009	-	-	-		0.0660009	0	0.573542	0.139806	-	-	-	0.306697	0.356674
P37N W1	0.2708	0.261529	-	-	0.00655507	0.266164	0.0246279	0.44813	0.427377	-	-	0.0146745	0.437753	0.0335224	3.29618	3.58468	-	-	0.204005	3.44043	0.0592964	11.8458	12.7705	-	-	0.653867	12.3081	0.0531249	0.0255457	-	-	-		0.0255457	0	0.636833	0.634423	-	-	0.00170398	0.635628	0.00268078	3.3305	1.60848	-	-	-	1.21766	2.46949
P38N W1	0.226386	0.234735	-	-	0.00590339	0.23056	0.0256046	0.858503	0.856998	-	-	0.00106476	0.85775	0.00124134	3.22125	3.39638	-	-	0.123836	3.30882	0.0374261	10.4502	11.1619	-	-	0.503226	10.806	0.046569	0.0177392	-	-	-		0.0177392	0	0.404114	0.395291	-	-	0.00623846	0.399703	0.0156078	3.34449	1.64717	-	-	-	1.20019	2.49583
P39N W1	0.108	-	-	-		0.108	0	0.616	-	-	-		0.616	0	2.818	-	-	-		2.818	0	11.726	-	-	-		11.726	0	-	-	-	-				0.153	-	-	-		0.153	0	1.057	-	-	-	-		1.057
P40N W1	0.137	-	-	-		0.137	0	1.522	-	-	-		1.522	0	2.677	-	-	-		2.677	0	9.183	-	-	-		9.183	0	-	-	-	-				0.234	-	-	-		0.234	0	1.923	-	-	-	-		1.923
P34N* W1	0.148	-	-	-		0.148	0	0.133	-	-	-		0.133	0	2.021	-	-	-		2.021	0	6.222	-	-	-		6.222	0	-	-	-	-				0.291	-	-	-		0.291	0	1.241	-	-	-	-		1.241
P35N W2	0.0643136	-	-	-		0.0643136	0	-	-	-	-				-	-	-	-				2.16527	0.382903	-	-	1.26032	1.27409	0.989198	-	-	-	-				0.0594809	0.0399795	-	-	0.0137896	0.0497302	0.277289	0.158278	-	-	-	-		0.158278
P36N W2	0.0632129	-	-	-		0.0632129	0	0.0360164	0.00201848	-	-	0.0240402	0.0190174	1.26411	1.34345	-	-	-		1.34345	0	2.27158	0.429035	-	-	1.30288	1.35031	0.964874	-	-	-	-				-	-	-	-				-	-	-	-	-
P37N W2	0.0692652	-	-	-		0.0692652	0	-	-	-	-				-	-	-	-				2.49763	0.710556	-	-	1.26365	1.60409	0.787766	-	-	-	-				0.0969391	0.0871386	-	-	0.00693002	0.0920389	0.0752945	0.498558	0.166143	-	-	-	0.235053	0.332351
P38N W2	0.0776152	-	-	-		0.0776152	0	0.0724955	0.0800765	-	-	0.0053606	0.076286	0.0702698	1.36068	1.37137	-	-	0.0075574	1.36603	0.0055324	3.03365	1.69825	-	-	0.944267	2.36595	0.399107	-	-	-	-				0.112106	0.118	-	-	0.00416792	0.115053	0.0362261	0.839839	0.31207	-	-	-	0.373189	0.575954
P39N W2	0.057	-	-	-		0.057	0	-	-	-	-				1.354	-	-	-		1.354	0	4.35	-	-	-		4.35	0	-	-	-	-				-	-	-	-				0.053	-	-	-	-		0.053
P40N W2	0.062	-	-	-		0.062	0	0.172	-	-	-		0.172	0	1.355	-	-	-		1.355	0	1.005	-	-	-		1.005	0	-	-	-	-				0.049	-	-	-		0.049	0	0.148	-	-	-	-		0.148
P34N* W2	0.078	-	-	-		0.078	0	-	-	-	-				1.489	-	-	-		1.489	0	2.784	-	-	-		2.784	0	-	-	-	-				0.157	-	-	-		0.157	0	0.705	-	-	-	-		0.705
AS.P35N	11.189	11.195	-	-	0.00424264	11.192	0.000379078	1.5	1.573	-	-	0.0516188	1.5365	0.0335951	1.402	1.387	-	-	0.0106066	1.3945	0.00760602	-	-	-	-				0.177	0.185	-	-	0.00565685	0.181	0.0312533	0.093	0.081	-	-	0.00848528	0.087	0.097532	-	-	-	-	-
AS.P36N	9.879	9.886	11.256	-	0.792998	10.3403	0.0766898	3.352	3.353	1.773	-	0.911925	2.826	0.322691	1.395	1.393	1.374	-	0.0115902	1.38733	0.00835432	0.457	0.439	-	-	0.0127279	0.448	0.0284105	0.172	0.162	0.157	-	0.00763763	0.163667	0.0466657	0.1	0.087	0.092	-	0.00655744	0.093	0.0705101	-	-	-	-	-
AS.P37N	11.403	11.239	11.209	-	0.104429	11.2837	0.00925485	1.185	1.385	1.4	-	0.120035	1.32333	0.0907063	1.407	1.42	1.411	-	0.00665833	1.41267	0.0047133	-	-	-	-				0.181	0.173	0.187	-	0.00702377	0.180333	0.0389488	0.093	0.115	0.09	-	0.0136504	0.0993333	0.13742	-	-	-	-	-
AS.P38N	11.785	11.646	-	-	0.0982878	11.7155	0.00838956	1.784	1.854	-	-	0.0494975	1.819	0.0272114	1.426	1.404	-		0.0155563	1.415	0.0109939	-	-	-	-				0.177	0.203	-	-	0.0183848	0.19	0.096762	0.095	0.107	-	-	0.00848528	0.101	0.0840127	-	-	-	-	-
AS.P39N	9.311	9.313	-	-	0.00141421	9.312	0.00015187	1.552	1.57	-	-	0.0127279	1.561	0.0081537	1.38	1.37	-		0.00707107	1.375	0.00514259	-	-	-	-				0.144	0.157	-	-	0.00919239	0.1505	0.061079	0.081	0.074	-	-	0.00494975	0.0775	0.0638677	-	-	-	-	-
AS.P40N	11.538	11.393	-	-	0.10253	11.4655	0.00894252	2.022	2.085	-	-	0.0445477	2.0535	0.0216936	1.415	1.391	-			1.403	0	-	-	-	-				0.17	0.209	-	-	0.0275772	0.1895	0.145526	0.114	0.116	-	-	0.00141421	0.115	0.0122975	-	-	-	-	-
AS.P34N*	11.314	-	-	-		11.314	0	1.655	-	-	-		1.655	0	1.358	-	-	-		1.358	0	-	-	-	-				0.156	-	-	-		0.156	0	0.095	-	-	-		0.095	0	-	-	-	-	-
71	0.686736	0.688409	0.706668	0.656146	0.0209416	0.68449	0.0305945	9.97994	9.90978	10.0196	9.66683	0.158128	9.89403	0.0159821	15.8595	14.7602	15.2074	14.377	0.636924	15.051	0.0423176	48.5997	50.3907	48.6819	47.9133	1.05414	48.8964	0.0215587	0.131019	0.0820151	0.114869	-	0.0249718	0.109301	0.228468	0.657099	0.670266	0.597603	0.647083	0.0317268	0.643013	0.0493409	9.8801	6.86547	4.50147	10.3738	-	0.349085	10.1269
73	0.62507	0.647442	0.645372	0.585068	0.0289315	0.625738	0.0462357	6.24796	6.34308	6.28199	5.93634	0.181652	6.20234	0.0292877	12.72	12.312	12.5692	11.3523	0.614256	12.2384	0.0501909	36.8502	38.8218	37.1965	35.8726	1.22661	37.1853	0.0329865	-	-	-	-				0.398235	0.381302	0.378709	0.364754	0.0137363	0.38075	0.0360769	2.70488	1.52719	0.874534	2.63705	-	0.0479644	2.67096
75	2.04563	2.05992	2.08102	1.95669	0.0547139	2.03581	0.0268757	5.88298	5.77515	5.83724	5.61838	0.115493	5.77844	0.019987	23.9515	22.3292	23.5609	22.5722	0.776764	23.1035	0.0336211	77.3827	78.8586	77.341	75.0244	1.58408	77.1517	0.020532	-	-	-	-				4.18876	4.12377	4.14625	3.9371	0.111226	4.09897	0.0271351	23.882	17.3377	8.39657	24.4808	-	0.423376	24.1814
77	1.61094	1.62812	1.67412	1.61232	0.0295445	1.63138	0.0181102	2.5487	2.4042	2.62938	2.54083	0.0933921	2.53078	0.0369025	21.56	20.1573	21.7144	21.0881	0.701005	21.1299	0.0331759	77.0209	78.7899	77.6486	77.2437	0.786887	77.6758	0.0101304	0.0810448	0.0722373		0.063075	0.00898553	0.072119	0.124593	5.07979	4.98757	5.18392	5.31598	0.141119	5.14181	0.0274454	31.2667	22.294	12.3999	32.4344	-	0.825681	31.8505
79	1.56545	1.54219	1.60873	1.52631	0.0358459	1.56067	0.0229683	11.1433	10.9782	11.2879	10.8062	0.208018	11.0539	0.0188186	22.6124	20.2679	21.4112	20.6791	1.02833	21.2426	0.0484086	71.0001	72.2542	70.7512	68.6112	1.51251	70.6542	0.0214073	0.0636479	0.0482598	0.0254307	0.04454	0.0157126	0.0454696	0.345563	2.43281	2.44263	2.48907	2.379	0.0451673	2.43588	0.0185425	26.2232	17.7393	10.4209	26.6519	-	0.303119	26.4375
82	0.687721	0.679383	0.704804	0.613532	0.0399776	0.67136	0.0595472	8.36804	8.27381	8.44475	7.78715	0.295902	8.21844	0.0360046	14.4053	13.2475	14.2451	12.4897	0.898476	13.5969	0.0660795	45.0691	46.2539	44.9702	42.5643	1.54749	44.7144	0.0346083	0.111313	-	-	0.117888	0.00464919	0.1146	0.0405687	0.490087	0.545587	0.519978	0.488417	0.0272284	0.511017	0.0532828	7.13146	4.68219	2.32619	7.25488	-	0.0872711	7.19317
83	1.66451	1.69982	1.75464	1.66447	0.0425803	1.69586	0.0251084	2.55894	2.52369	2.64999	2.67026	0.0705756	2.60072	0.0271369	23.8593	21.7707	23.0779	23.6731	0.943812	23.0952	0.0408661	77.6138	78.8211	76.6425	78.0951	0.913635	77.7931	0.0117444	-	-	-	-				5.16123	5.07344	5.20934	5.20845	0.0638668	5.16311	0.0123698	21.0393	15.3628	7.92482	23.6682	-	1.85894	22.3537
85	1.7861	1.77035	1.86064	1.77674	0.0419541	1.79846	0.0233278	2.9856	2.78761	2.94334	2.97211	0.0914152	2.92216	0.0312834	23.1496	20.8847	22.8612	23.0093	1.0675	22.4762	0.0474948	80.9825	81.3641	80.8383	81.0435	0.221983	81.0571	0.0027386	0.0919043	0.0689517	-	0.069136	0.0131988	0.076664	0.172164	5.12493	5.00239	5.24124	5.42823	0.181172	5.1992	0.0348461	31.1906	20.4081	10.4079	32.8756	-	1.19144	32.0331
87	3.09974	3.21549	3.18764	3.09949	0.0599497	3.15059	0.0190281	12.6105	12.5144	12.5537	12.6231	0.0506599	12.5754	0.00402849	41.8946	37.1253	41.2541	40.4387	2.12067	40.1782	0.0527815	119.047	120.415	119.324	118.65	0.75618	119.359	0.00633534	0.0185747	-	-			0.0185747	0	4.88061	4.84435	4.96532	5.13256	0.128333	4.95571	0.025896	33.2255	22.1655	14.6535	33.5884	-	0.256633	33.407
89	1.52083	1.50647	1.55974	1.5209	0.0228663	1.52698	0.0149748	10.6186	10.4685	10.7299	10.5078	0.117792	10.5812	0.0111322	21.6007	19.4744	21.0736	20.4129	0.916725	20.6404	0.0444142	69.6819	71.0323	69.5904	68.9248	0.88358	69.8074	0.0126574	0.152188	0.111949	-	0.126307	0.0203928	0.130148	0.15669	2.30127	2.39606	2.46439	2.43596	0.0711808	2.39942	0.0296658	28.7944	19.0617	10.2932	29.5959	-	0.566705	29.1952
72 W1	0.126	-	-	-		0.126		2.007	-	-	-		2.007		3.614	-	-	-		3.614		14.361	-	-	-		14.361		-	-	-	-				0.173	-	-	-		0.173		2.413	-	-	-	-		2.413
74 W1	0.103	-	-	-		0.103		0.91	-	-	-		0.91		2.711	-	-	-		2.711		8.737	-	-	-		8.737		-	-	-	-				0.093	-	-	-		0.093		0.334	-	-	-	-		0.334
76 W1	0.521	-	-	-		0.521		1.337	-	-	-		1.337		6.34	-	-	-		6.34		27.165	-	-	-		27.165		-	-	-	-				1.084	-	-	-		1.084		6.719	-	-	-	-		6.719
78 W1	0.369	-	-	-		0.369		0.436	-	-	-		0.436		5.11	-	-	-		5.11		23.107	-	-	-		23.107		-	-	-	-				1.207	-	-	-		1.207		8.49	-	-	-	-		8.49
80 W1	0.359	-	-	-		0.359		2.411	-	-	-		2.411		5.408	-	-	-		5.408		22.916	-	-	-		22.916		-	-	-	-				0.643	-	-	-		0.643		7.782	-	-	-	-		7.782
81 W1	0.128	-	-	-		0.128		1.548	-	-	-		1.548		3.339	-	-	-		3.339		12.436	-	-	-		12.436		-	-	-	-				0.131	-	-	-		0.131		1.718	-	-	-	-		1.718
84 W1	0.504	-	-	-		0.504		0.612	-	-	-		0.612		6.97	-	-	-		6.97		30.827	-	-	-		30.827		-	-	-	-				1.619	-	-	-		1.619		8.065	-	-	-	-		8.065
86 W1	0.502	-	-	-		0.502		0.652	-	-	-		0.652		6.339	-	-	-		6.339		29.76	-	-	-		29.76		-	-	-	-				1.484	-	-	-		1.484		10.727	-	-	-	-		10.727
88 W1	0.84	-	-	-		0.84		3.302	-	-	-		3.302		10.963	-	-	-		10.963		45.364	-	-	-		45.364		-	-	-	-				1.45	-	-	-		1.45		11.134	-	-	-	-		11.134
90 W1	0.342	-	-	-		0.342		2.258	-	-	-		2.258		5.074	-	-	-		5.074		21.741	-	-	-		21.741		-	-	-	-				0.569	-	-	-		0.569		7.477	-	-	-	-		7.477
72 W2	0.073	-	-	-		0.073		0.574	-	-	-		0.574		1.855	-	-	-		1.855		4.094	-	-	-		4.094		-	-	-	-				0.072	-	-	-		0.072		0.821	-	-	-	-		0.821
74 W2	0.06	-	-	-		0.06		0.148	-	-	-		0.148		1.497	-	-	-		1.497		1.748	-	-	-		1.748		-	-	-	-					-	-	-					-	-	-	-
76 W2	0.191	-	-	-		0.191		0.399	-	-	-		0.399		2.705	-	-	-		2.705		8.837	-	-	-		8.837		-	-	-	-				0.453	-	-	-		0.453		2.858	-	-	-	-		2.858
78 W2	0.117	-	-	-		0.117		0.051	-	-	-		0.051		2.229	-	-	-		2.229		6.415	-	-	-		6.415		-	-	-	-				0.419	-	-	-		0.419		3.074	-	-	-	-		3.074
80 W2	0.125	-	-	-		0.125		0.65	-	-	-		0.65		2.269	-	-	-		2.269		6.458	-	-	-		6.458		-	-	-	-				0.234	-	-	-		0.234		2.844	-	-	-	-		2.844
81 W2	0.063	-	-	-		0.063		0.391	-	-	-		0.391		1.725	-	-	-		1.725		3.208	-	-	-		3.208		-	-	-	-				0.04	-	-	-		0.04		0.502	-	-	-	-		0.502
84 W2	0.17	-	-	-		0.17		0.11	-	-	-		0.11		2.553	-	-	-		2.553		8.775	-	-	-		8.775		-	-	-	-				0.572	-	-	-		0.572		3.317	-	-	-	-		3.317
86 W2	0.185	-	-	-		0.185		0.158	-	-	-		0.158		2.803	-	-	-		2.803		10.216	-	-	-		10.216		-	-	-	-				0.607	-	-	-		0.607		5.029	-	-	-	-		5.029
88 W2	0.27	-	-	-		0.27		0.905	-	-	-		0.905		3.803	-	-	-		3.803		14.086	-	-	-		14.086		-	-	-	-				0.578	-	-	-		0.578		4.745	-	-	-	-		4.745
90 W2	0.122	-	-	-		0.122		0.587	-	-	-		0.587		2.17	-	-	-		2.17		5.91	-	-	-		5.91		-	-	-	-				0.176	-	-	-		0.176		2.711	-	-	-	-		2.711
AS.72	10.575	10.58	10.631	-	0.00353553	10.5775	0.00033425	2.276	2.283	2.277	-	0.00378594	2.27867	0.00166147	1.571	1.544	1.687	-	0.0759759	1.60067	0.0474651	0.241	0.246	0.215	-	0.0166433	0.234	0.0711253	0.219	0.218	0.363	-	0.000707107	0.2185	0.00323619	0.126	0.134	0.056	-	0.00565685	0.13	0.0435143	-	-	-	-	-
AS.74	10.635	10.643	9.939	-	0.00565685	10.639	0.000531709	2.617	2.607	2.416	-	0.113271	2.54667	0.0444782	1.561	1.553	1.684	-	0.0734325	1.59933	0.0459144	0.42	0.375	0.311	-	0.0547753	0.368667	0.148577	0.191	0.19	0.32	-	0.000707107	0.1905	0.00371185	0.085	0.123	0.057	-	0.0268701	0.104	0.258366	-	-	-	-	-
AS.76	11.8	11.805	11.279	-	0.00353553	11.8025	0.000299558	1.287	1.275	1.255	-	0.0161658	1.27233	0.0127056	1.526	1.528	1.645	-	0.0681347	1.56633	0.0434995	-	-	-	-				0.297	0.288	0.398	-	0.00636396	0.2925	0.0217571	0.11	0.115	0.064	-	0.00353553	0.1125	0.031427	-	-	-	-	-
AS.78	12.466	12.516	-	-	0.0353553	12.491	0.00283047	1.276	1.217	-	-	0.0417193	1.2465	0.0334692	1.536	1.533	-	-	0.00212132	1.5345	0.00138242	-	-	-	-				0.274	0.277	-	-	0.00212132	0.2755	0.00769989	0.11	0.099	-	-	0.00777817	0.1045	0.0744323	-	-	-	-	-
AS.80	11.434	11.456	-	-	0.0155563	11.445	0.00135923	1.498	1.468	-	-	0.0212132	1.483	0.0143043	1.514	1.525	-	-	0.00777817	1.5195	0.0051189	-	-	-	-				0.263	0.269	-	-	0.00424264	0.266	0.0159498	0.095	0.132	-	-	0.026163	0.1135	0.230511	-	-	-	-	-
AS.81	10.383	10.364	-	-	0.013435	10.3735	0.00129513	2.416	2.451	-	-	0.0247487	2.4335	0.01017	1.587	1.567	-	-	0.0141421	1.577	0.00896775	0.349	0.322	-	-	0.0190919	0.3355	0.0569058	0.223	0.203	-	-	0.0141421	0.213	0.066395	0.118	0.131	-	-	0.00919239	0.1245	0.0738344	-	-	-	-	-
AS.84	11.512	11.356	-	-	0.110309	11.434	0.00964743	1.003	1.186	-	-	0.129401	1.0945	0.118228	1.505	1.51	-	-	0.00353553	1.5075	0.0023453	-	-	-	-				0.306	0.296	-	-	0.00707107	0.301	0.0234919	0.095	0.084	-	-	0.00777817	0.0895	0.086907	-	-	-	-	-
AS.86	11.39	11.374	-	-	0.0113137	11.382	0.000994	1.144	1.12	-	-	0.0169706	1.132	0.0149917	1.507	1.514	-	-	0.00494975	1.5105	0.00327689	-	-	-	-				0.265	0.27	-	-	0.00353553	0.2675	0.0132169	0.094	0.101	-	-	0.00494975	0.0975	0.0507666	-	-	-	-	-
AS.88	11.253	11.26	-	-	0.00494975	11.2565	0.000439723	1.349	1.356	-	-	0.00494975	1.3525	0.0036597	1.492	1.498	-	-	0.00424264	1.495	0.00283789	-	-	-	-				0.253	0.232	-	-	0.0148492	0.2425	0.061234	0.092	0.109	-	-	0.0120208	0.1005	0.11961	-	-	-	-	-
AS.90	11.214	11.247	11.514	-	0.0233345	11.2305	0.00207778	1.444	1.465	1.568	-	0.0663652	1.49233	0.0444707	1.851	1.557	1.642	-	0.151296	1.68333	0.0898785	-	-	-	-				0.292	0.303	0.417	-	0.00777817	0.2975	0.0261451	0.1	0.067	0.049	-	0.0233345	0.0835	0.279455	-	-	-	-	-
AS.R.1-R3	6.634	7.069	7.807	-	0.592987	7.438	0.0797239	3.606	3.857	4.149	-	0.271758	3.87067	0.0702096	2.117	1.408	1.43		0.403141	1.65167	0.244081	3.966	4.163	3.371	-	0.41233	3.83333	0.107564	0.543	0.681	2.007	-	0.0975807	0.612	0.159446	-	-	-	-				-	-	-	-	-
AS.R.4	7.46	9.671	9.577	7.724	1.17874	8.608	0.136936	3.934	3.702	3.749	4.815	0.519739	4.05	0.128331	1.429	1.394	1.409	1.487	0.0407707	1.42975	0.028516	3.308	1.614	1.604	2.556	0.531744	2.932	0.181359	2.149	0.24	0.201	0.202	0.0222336	0.214333	0.103734	0.084	0.088	-	-	0.00282843	0.086	0.0328887	-	-	-	-	-
AS.R.5	7.667	7.616	7.783	-	0.0855823	7.68867	0.011131	4.95	4.743	5.05	-	0.156577	4.91433	0.0318613	1.444	1.453	1.369		0.0461194	1.422	0.0324328	2.541	2.506	2.634	-	0.0661539	2.56033	0.025838	0.182	0.197	0.155	-	0.0212838	0.178	0.119572	0.087	0.092	0.09	0.069	0.0105357	0.0845	0.124682	-	-	-	-	-
AS.R.7	7.557	7.527	-	-	0.0212132	7.542	0.00281268	4.445	4.451	-	-	0.00424264	4.448	0.000953831	1.499	1.498			0.000707107	1.4985	0.000471876	2.617	2.4	-	-	0.153442	2.5085	0.0611689	0.409	0.327	-	-	0.0579828	0.368	0.157562	0.063	0.059	-	-	0.00282843	0.061	0.0463677	-	-	-	-	-
AS.R.8	7.062	7.055	-	-	0.00494975	7.0585	0.000701246	4.286	4.24	-	-	0.0325269	4.263	0.00763005	1.507	1.493			0.00989949	1.5	0.00659966	2.239	2.063	-	-	0.124451	2.151	0.0578572	0.197	0.164	-	-	0.0233345	0.1805	0.129277	0.065	0.055	-	-	0.00707107	0.06	0.117851	-	-	-	-	-
AS.R.9	7.409	7.369	-	-	0.0282843	7.389	0.00382789	4.439	4.477	-	-	0.0268701	4.458	0.00602738	1.531	1.518			0.00919239	1.5245	0.00602977	2.137	2.106	-	-	0.0219203	2.1215	0.0103325	0.159	0.157	-	-	0.00141421	0.158	0.00895072	0.069	0.061	-	-	0.00565685	0.065	0.0870285	-	-	-	-	-
[truncated: 2 more columns]
